# Supplementary material for: Brain hemispheres with right temporal lobe damage swap dominance in early auditory processing of lexical tones
Source: Frontiers journal article supplement (doi:10.3389/fnins.2022.909796), 2022-08-26
Supplement: Image_1.pdf [file Image_1.pdf]

## Supplementary Material

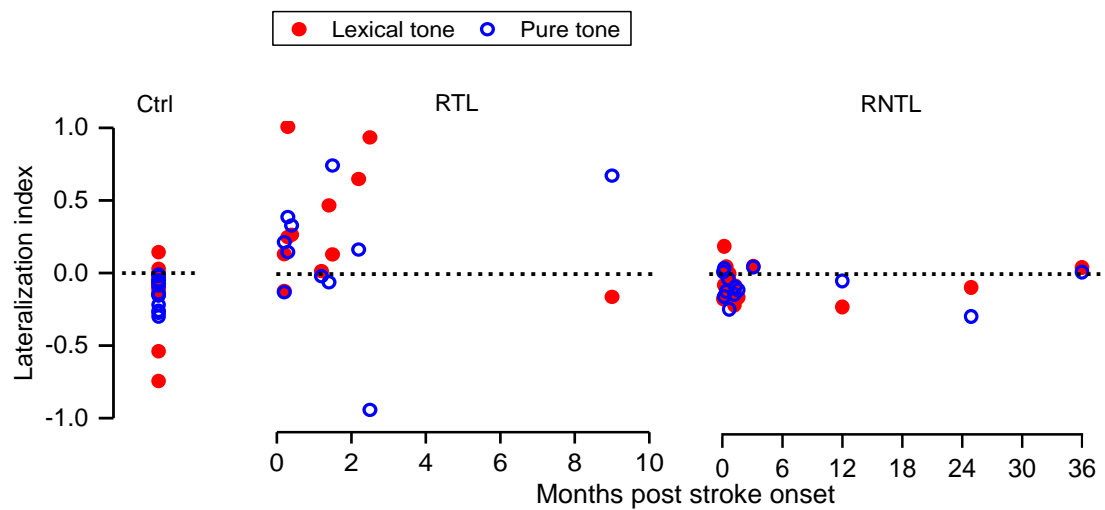

**Supplementary Figure 1. Relationships between lateralization index (LI) and time post stroke onset.** There was no significant relationship between LI for the lexical tone contrast or the pure tone contrast and time post stroke onset in the RTL or RNTL groups.

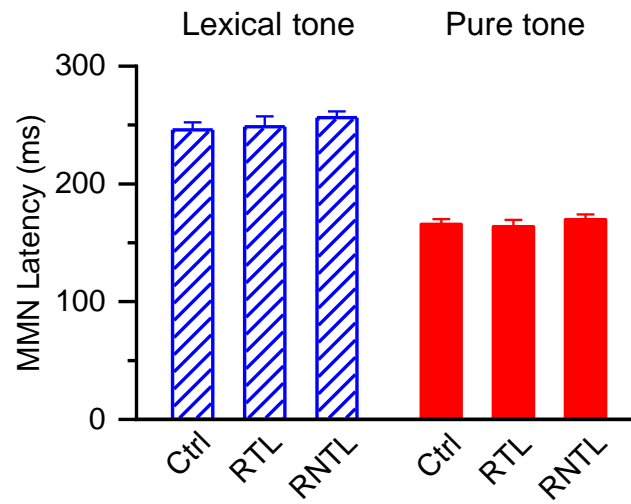

**Supplementary Figure 2. MMN latency recorded from electrode Fz.** There was no significant difference of MMN latencies between Ctrl, RTL and RNTL groups in lexical tone contrast or pure tone contrast.
